CORRECTION

# Correction: *Spiroplasma* infection in *Harmonia axyridis* - Diversity and multiple infection

The PLOS ONE Staff

There are errors in the Funding section. The publisher apologizes for the errors. The correct funding information is as follows: The study of *Spiroplasma* in western group of populations of *H.axyridis* was supported by the Russian Foundation for Basic Research, 15-04-07466\_A (IG). The study of *Spiroplasma* in eastern group of populations of *H.axyridis*—the source of the global invasion, was supported by the Russian Science Foundation, 16-16-00079 (IZ). The funders had no role in study design, data collection and analysis, decision to publish, or preparation of the manuscript.

## Reference

1. Goryacheva I, Blekhman A, Andrianov B, Romanov D, Zakharov I (2018) *Spiroplasma* infection in *Harmonia axyridis* - Diversity and multiple infection. PLoS ONE 13(5): e0198190. <https://doi.org/10.1371/journal.pone.0198190> PMID: 29813113

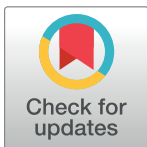

## OPEN ACCESS

**Citation:** The PLOS ONE Staff (2018) Correction: *Spiroplasma* infection in *Harmonia axyridis* - Diversity and multiple infection. PLoS ONE 13(8): e0202444. <https://doi.org/10.1371/journal.pone.0202444>

**Published:** August 9, 2018

**Copyright:** © 2018 The PLOS ONE Staff. This is an open access article distributed under the terms of the [Creative Commons Attribution License](https://creativecommons.org/licenses/by/4.0/), which permits unrestricted use, distribution, and reproduction in any medium, provided the original author and source are credited.
